# Supplementary material
Source: PubMed Central journal article supplement (PMC3865863)

# Supplementary Material

## Trapping and breaking of *in vivo* nicked DNA during pulsed-field gel electrophoresis

**Sharik R. Khan\* and Andrei Kuzminov**

Department of Microbiology, University of Illinois at Urbana-Champaign, Urbana, IL  
61801, USA

\* for correspondence: Sharik R. Khan, B103 C&LSL, 601 South Goodwin Ave., Urbana IL 61801-3709, USA. TEL: (217) 265-0852. FAX: (217) 244-6697. email: sharik@illinois.edu

**Short title:** PFGE converts nicks into double-strand breaks

**Subject Category:** Electrophoretic Techniques

**Abbreviations:** PFGE, pulsed-field gel electrophoresis; LLFS, long run at low field strength; SHFS, short run at high field strength; CZ, compression zone; UV, ultraviolet light; HMW, high molecular weight; LMW, low molecular weight; DBA, different batch of agarose.

**Table S1. Summary of results.**

| <b>Strains</b>                           | <b>Experiments</b>                                                                  | <b>Conclusions</b>                                                                                                                                      | <b>Respective Figures</b> |
|------------------------------------------|-------------------------------------------------------------------------------------|---------------------------------------------------------------------------------------------------------------------------------------------------------|---------------------------|
| AB1157, SK129<br>AK107, SRK312<br>SRK322 | Spontaneous and<br>Clastogen- induced<br>fragmentation at 3V<br>and 6V              | HMW DNA is trapped and<br>broken during PFEG, Number of<br>nicks determine the extent of<br>chromosomal<br>fragmentation                                | 1, 2, and<br>S1, S2       |
| SK129, SRK312<br>SRK322                  | Kinetics of UV-<br>induced fragmentation<br>at 3V and 6V                            | Increase in fragmentation is due<br>to release of DNA from wells,<br>nick-dependent breakage is FS-<br>independent                                      | 3, S4, S5<br>and S6       |
| SK129, SRK312<br>SRK322                  | Field strength Vs. time                                                             | Both time of electrophoresis and<br>FS are important for trapping and<br>nick-dependent fragmentation<br>increase, especially in the DBA<br>experiments | 4, 5 and S7               |
| SK129, SRK301                            | Excision- and FS-<br>dependent breakage of<br><i>NotI</i> fragments at 3V<br>and 6V | Nick-dependent breakage is FS-<br>independent, number of nicks<br>determines the final size of DNA<br>fragments during PFGE                             | 6, S8 and<br>S9           |

## SUPPLEMENTARY FIGURE LEGENDS

**Figure S1.** Effect of electrophoretic conditions on the extent of spontaneous and DNA damage-induced chromosomal fragmentation. Samples were run on a 1% agarose gel at 12°C in 0.5X TBE with 60-120 seconds switch time, either at 6 V/cm for 24 H, or at 3 V/cm for 72 H.

**(A)** Quantification of spontaneous fragmentation in AB1157, *recBC(Ts)*, *recBC(Ts) polA12*, *recBC(Ts) ligA251* and *recBC(Ts) dut-1* after growth of the strains at 37°C for 2 hours.

**(B)** The corresponding gel from which the quantification in "A" was derived. CZ, compression zone.

**(C)** Quantification of chromosomal fragmentation in *recBC(Ts)* cells upon exposure to a variety of DNA damaging agents. Cells were treated with clastogens as described in materials and methods and transferred to 37°C for 2 hours before the preparation of plugs.

**(D)** The corresponding gel from which the quantification in "C" was derived. CZ, compression zone.

**Figure S2.** Effect of electrophoretic conditions on the amount of signal staying within the wells (A and B); and total signal (well+lane) (C and D). Values are derived from the gels in Fig. S1, ran in a "different batch of agarose".

**(A)** Differences in the absolute amount of signal (arbitrary units) within wells in strains undergoing spontaneous fragmentation.

**(B)** Differences in the absolute amount of signal (arbitrary units) within wells in *recBC(Ts)* cells exposed to a variety of DNA damaging agents.

**(C)** Decrease in the total signal in strains undergoing spontaneous fragmentation, presented as ratios of the total signal in the LLFS conditions divided by the total signal from the same plug in the SHFS conditions.

**(D)** Decrease in the total signal in strains exposed to various clastogens (calculated as in "C").

**Figure S3.** Comparison of migration of the yeast chromosome markers and lambda concatemer markers in various electrophoretic conditions.

**Figure S4.** UV dose-dependence of chromosomal fragmentation in *recBC(Ts)* or its derivatives harboring additional mutations in *polA* or *ligA* genes. Agarose plugs were made after incubating the UV-exposed cultures at 37°C for 10 minutes. Plugs were run either at 6 V/cm for 24 H or at 3 V/cm for 72 H as described in Fig. 1, but using the "different batch of agarose". Panels A, C and E are radiograms of the gels. Panels B, D and F show quantification of fragmentation from the corresponding gels. CZ, compression zone.

**Figure S5.** Effect of UV exposure and electrophoretic conditions on the amount of total signal, as well as the signal staying within wells. *recBC(Ts)*, *recBC(Ts) polA12*, and

*recBC(Ts) ligA251* were exposed to various UV doses, and plugs were electrophoresed at 6 V/cm for 24 H or at 3 V/cm for 72 H.

(A) Quantification of changes in the signal inside the wells (calculated as percent of the total signal (well+lane)).

(B) Decrease in the amount of total signal. Fold decrease is calculated as total signal (well+lane) upon 3 V/cm electrophoresis ÷ total signal (well+lane) upon 6 V/cm electrophoresis.

**Figure S6.** Dissection of UV-induced chromosomal fragmentation.

(A) Comparison of migration of the yeast chromosome markers and lambda concatemer markers in various separation conditions.

(B, C, D) Distribution of UV dose-dependent fragmented DNA as observed upon SHFS and LLFS electrophoresis. The gels shown in Fig. S3BDE were used for quantification. The signal entering the lanes was subdivided into chromosomal fragments shorter than 0.7 MB and longer than 0.7 MB, as described in the text. (B) The *recBC(Ts)* single mutant. (C) The *recBC(Ts) polA12* double mutant. (D) The *recBC(Ts) ligA251* double mutant.

**Figure S7.** Effect of time of electrophoresis on signal within wells.

(A) Plugs made from UV exposed cultures of *recBC(Ts)* or its derivatives were run for 20 H or 72 H, either at 6 V/cm, or at 3 V/cm. Data is presented as fold change, which is the ratio of the amount of signal within wells obtained after 72 H electrophoresis over the signal obtained after 20 H electrophoresis under the same field strength.

(B) Plugs made from *recBC(Ts)*, *recBC(Ts) polA12* and *recBC(Ts) ligA251* after growth of the strains at 37°C for 2 hours (spontaneous fragmentation). Calculations were done as described in (A).

**Figure S8.** Quantification of UV-induced chromosomal fragmentation in non-replicating cells. Stationary cultures of *recBC(Ts)* and *recBC(Ts) uvrA* were exposed to the indicated UV doses, and plugs were made after 10 min incubation in spent culture medium, so not to "awaken" the cells. One set of plugs was digested with *NotI* and electrophoresed, together with non-*NotI* digested plugs, at 6 V/cm for 20H and 3 V/cm for 70H. The *NotI*-digested lanes are shown in Fig. 6BD.

(A) Dose-dependence of chromosomal fragmentation in undigested samples electrophoresed at 6V/cm for 20H.

(B) Percent signal in wells in *NotI*-digested samples upon 3 V/cm and 6 V/cm electrophoresis.

(C) Percent signal in the 360 kbp *NotI* doublet (fragment II) upon 3V electrophoresis.

**Figure S9.** *NotI* digestion and chromosomal fragmentation in non-replicating cells exposed to high UV doses. Stationary cultures of *recBC(Ts)* and *recBC(Ts) uvrA* mutants were exposed to 48 J/m<sup>2</sup> UV, and plugs were made after 10 min incubation in spent culture medium. One set of plugs were digested with *NotI* and electrophoresed, together with non-*NotI* digested plugs, at 6 V/cm for 20 H and 3 V/cm for 70 H.

(A) Chromosomal fragmentation in non *NotI*-digested samples at 6 V/cm.

(B) Radiogram of the gel from which the data in (A) are derived. CZ, compression zone.

- (C) Percent signal in the 1 Mbp *NotI* fragment (6 V/cm) and compression zone (3 V/cm).
- (D) Percent signal in the 360 kbp *NotI* doublet (fragment II) upon 3 V electrophoresis.
- (E) Radiogram of the gel from which the data in (D) is derived. CZ, compression zone, FII, fragment II.

**Fig. S1**

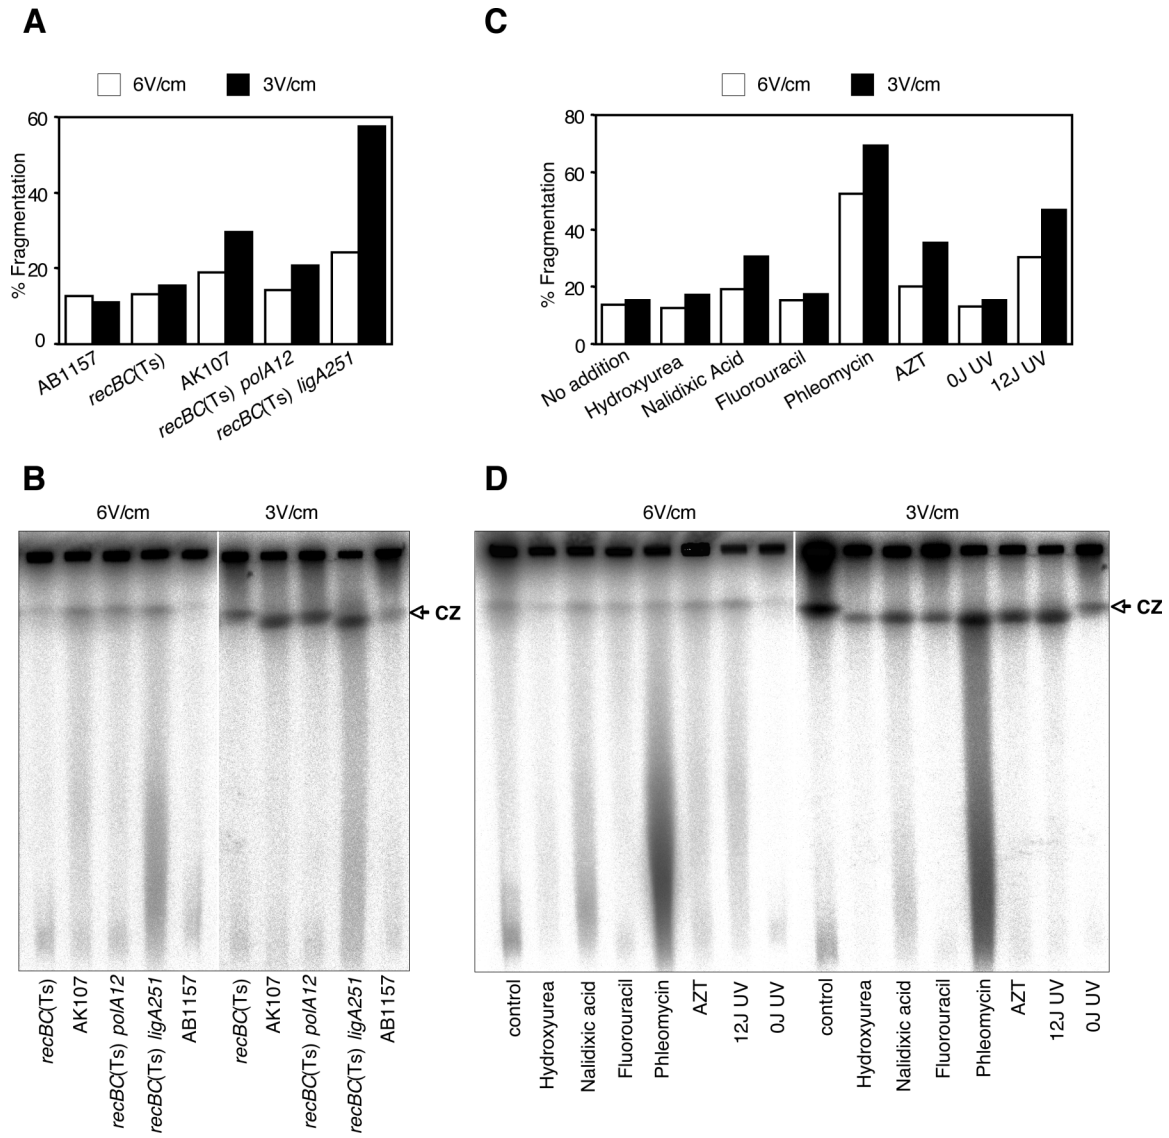

Fig. S2

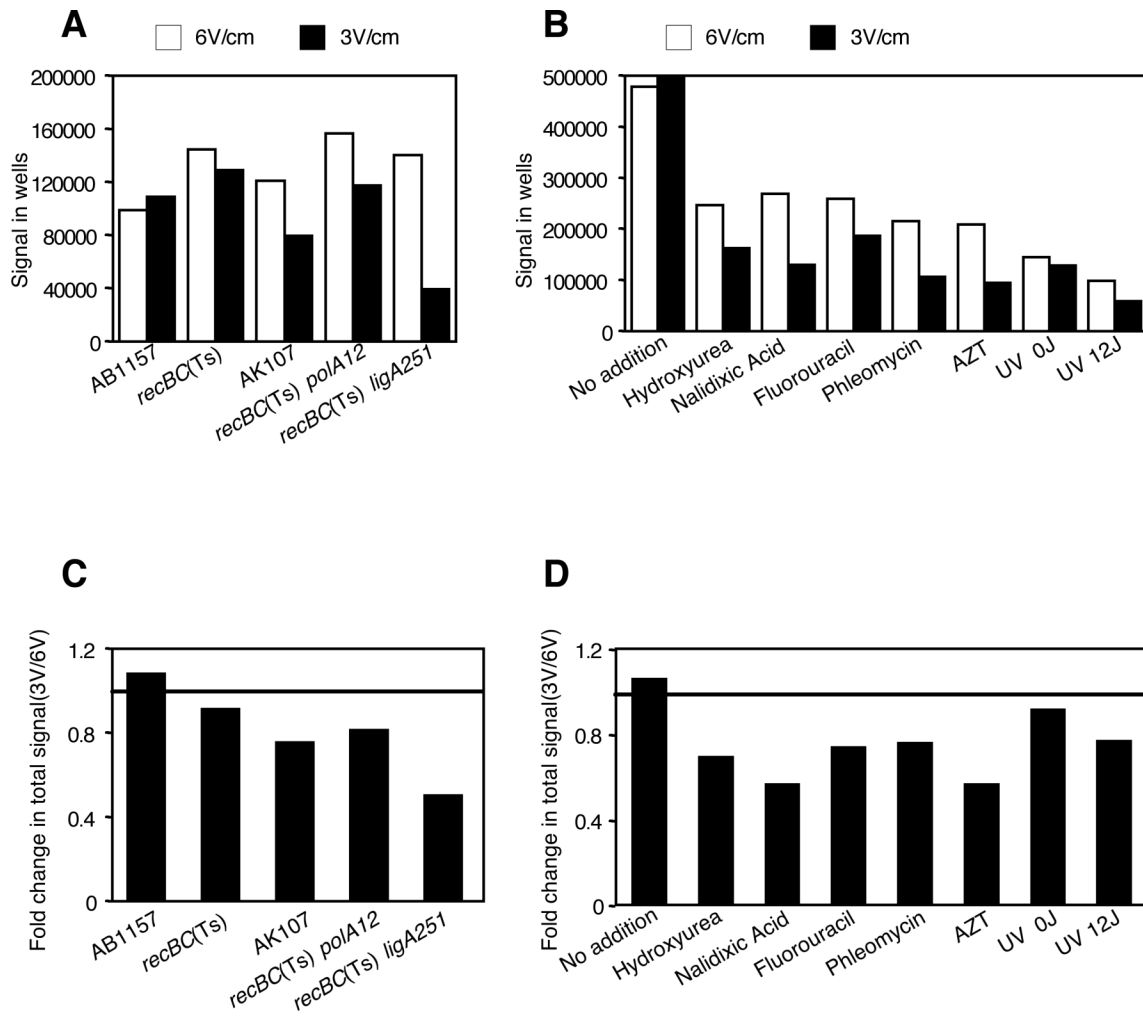

**Fig. S3**

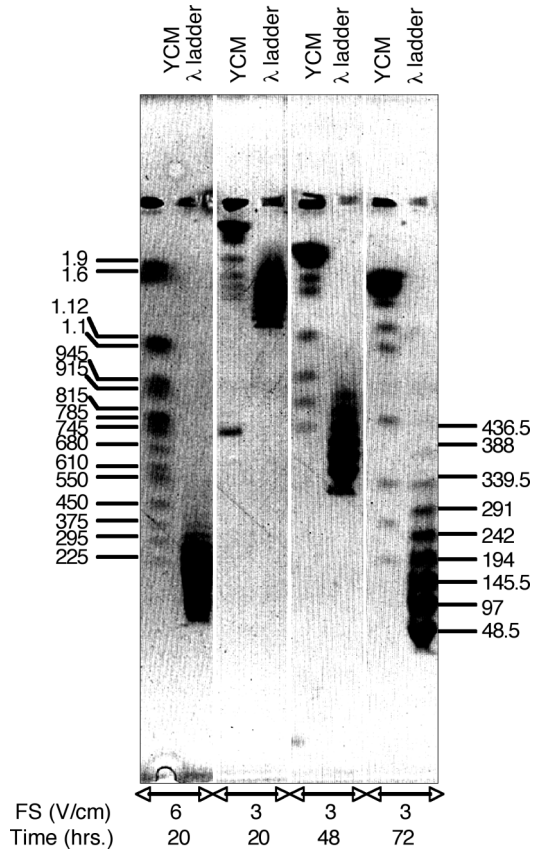



Fig. S4

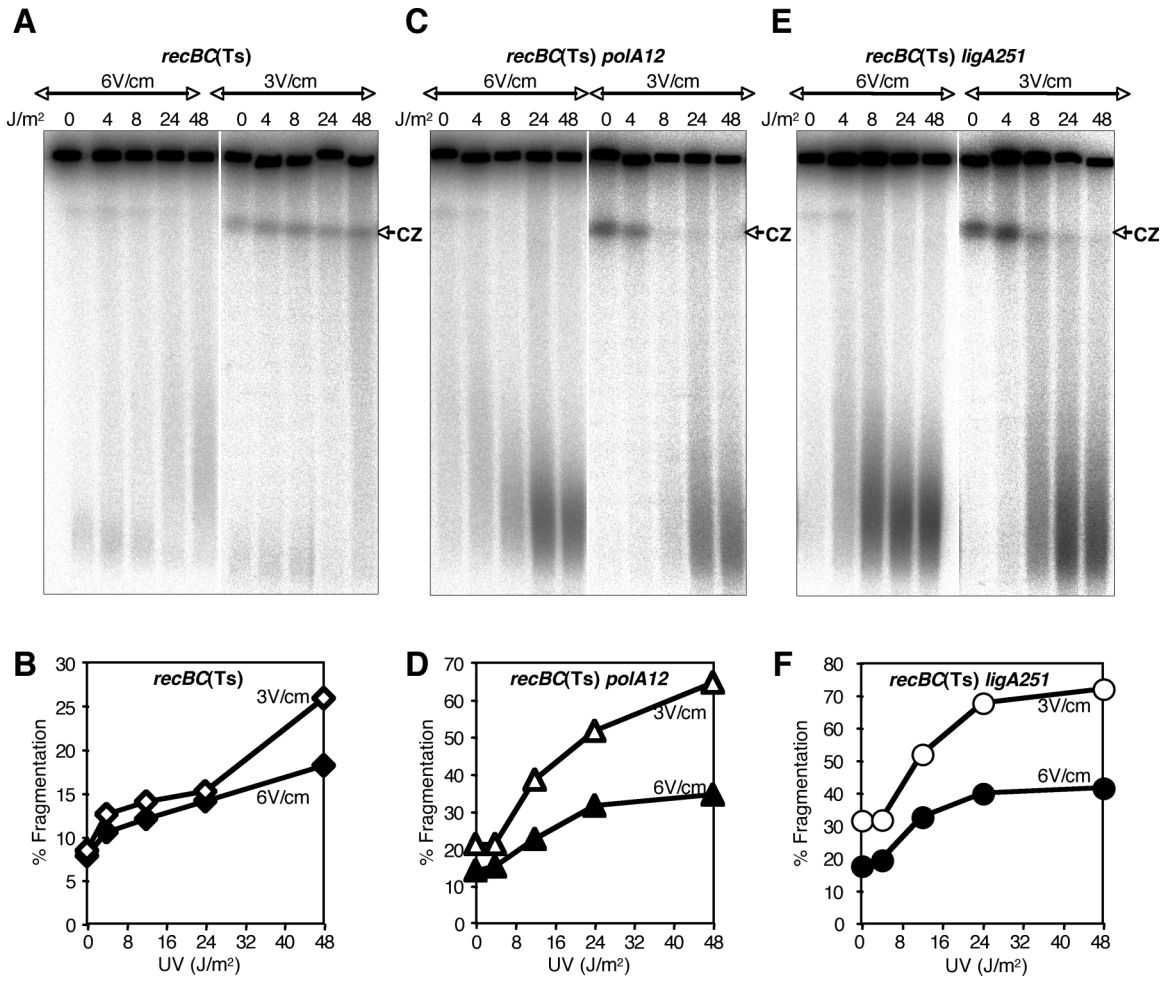

Fig. S5

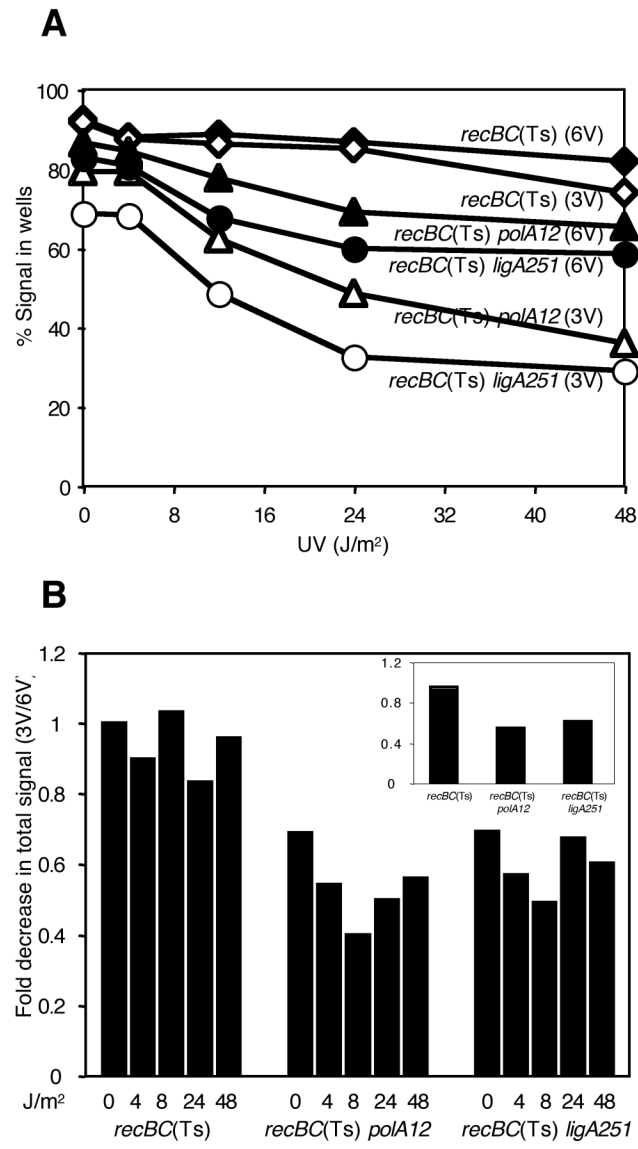

Fig. S6

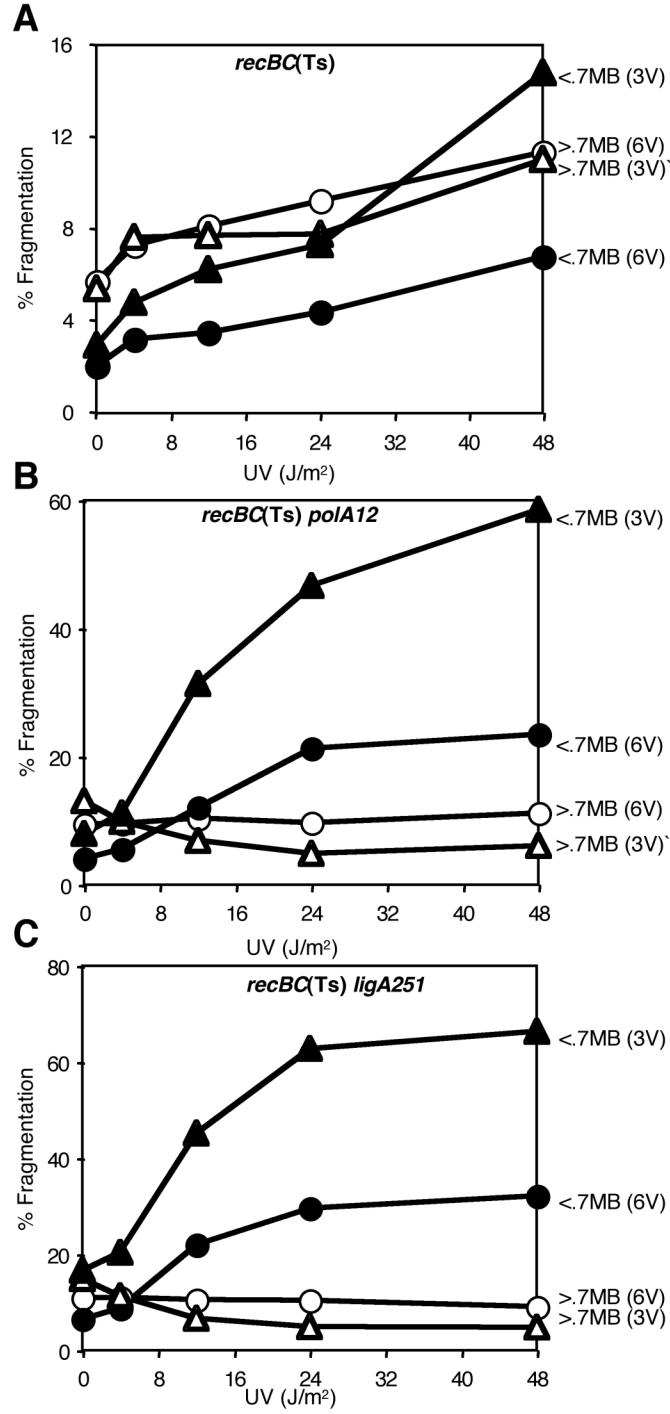

Fig. S7

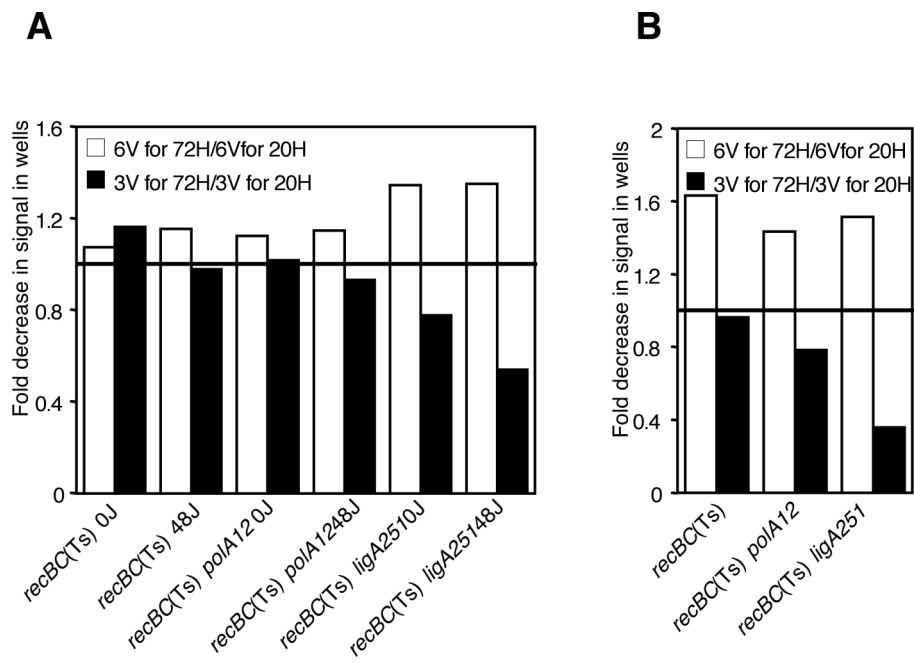

Fig. S8

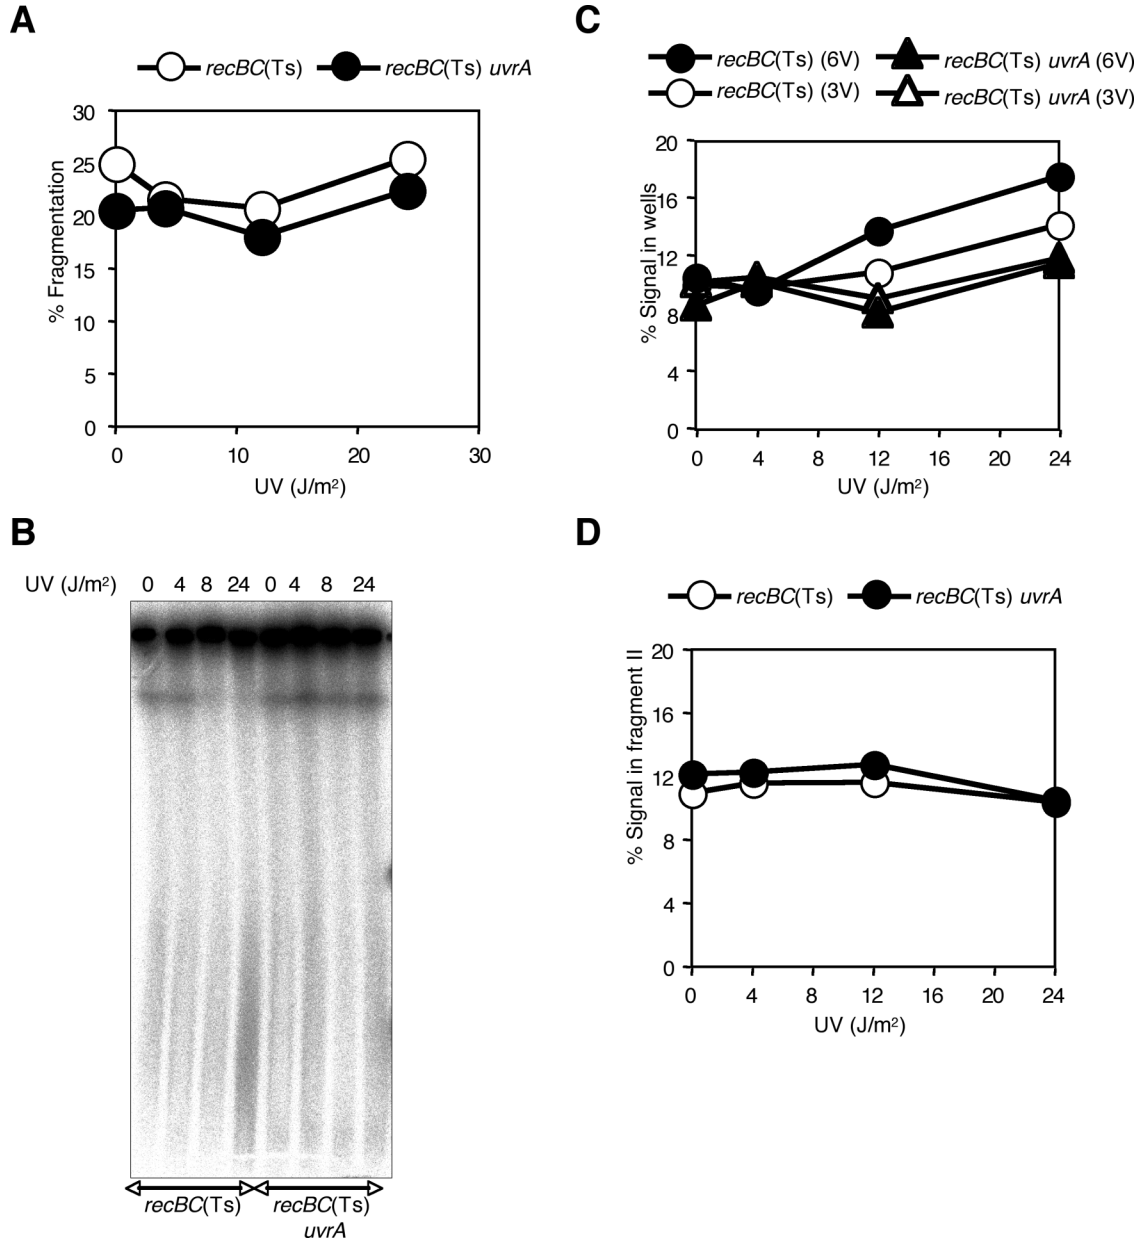

**Fig. S9**

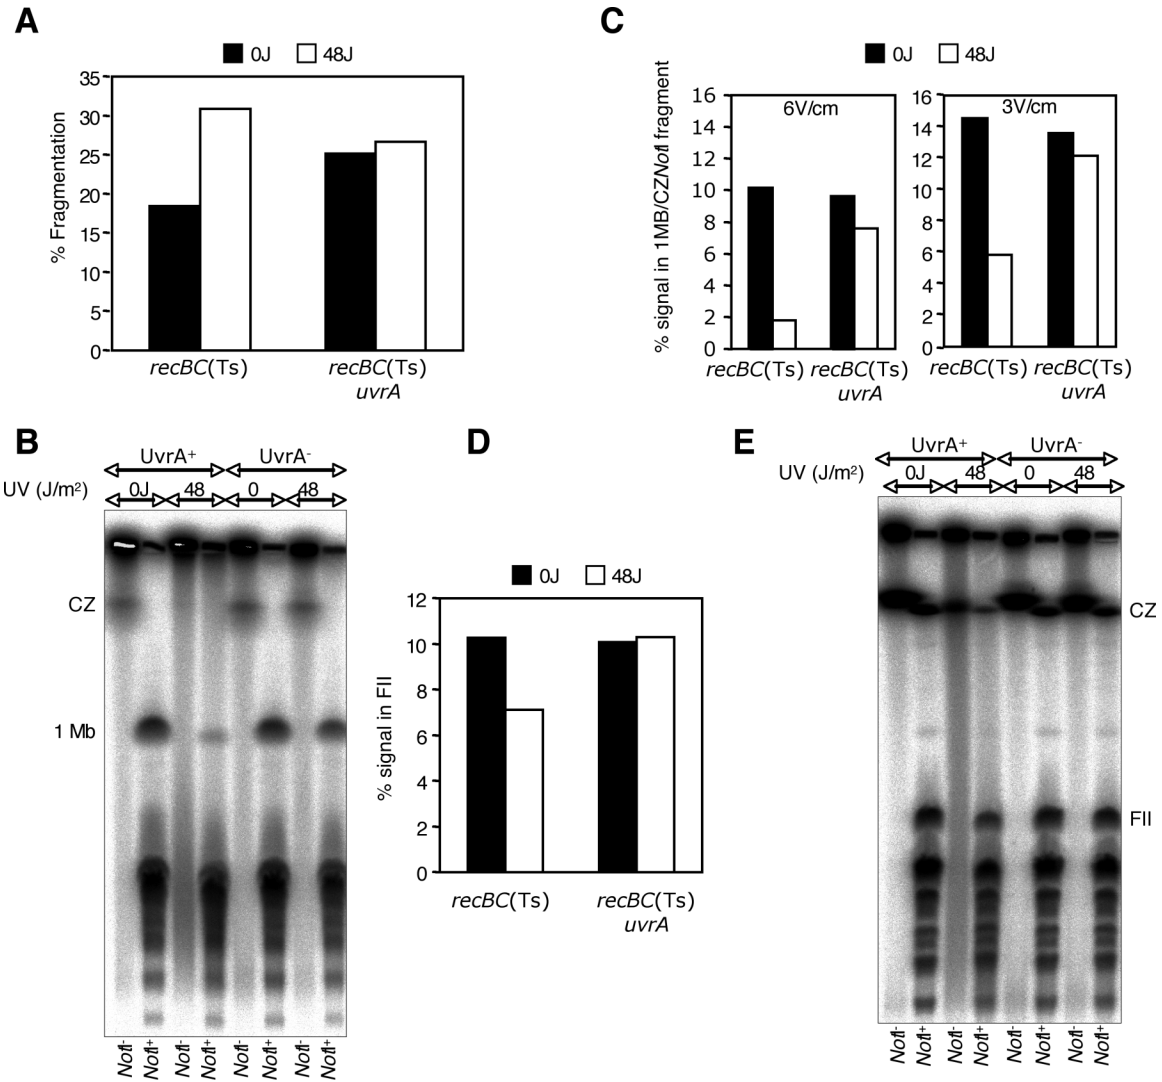

Supplement: NIHMS515267-supplement-01.pdf [file NIHMS515267-supplement-01.pdf]
